# Supplementary material
Source: PubMed Central journal article supplement (PMC2660615)
Supplement: tpc.108.063099_1.pdf [file tpc.108.063099_1.pdf]

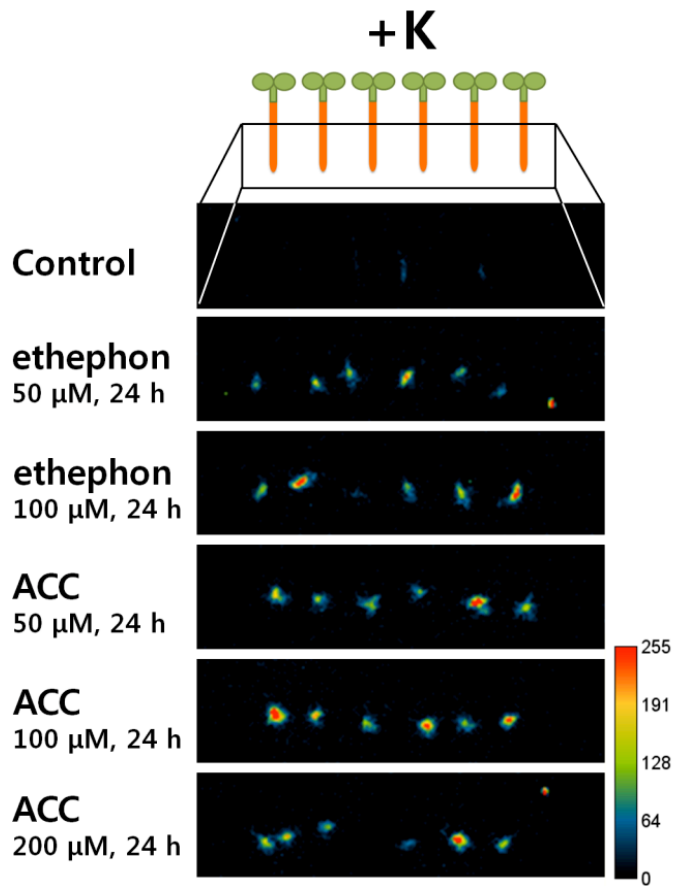

**Supplemental Figure 1.** Effects of ACC on *HAK5* expression in *Arabidopsis* roots.

ACC stimulates *HAK5* expression in roots. Pseudocolored luminescence images of homozygous transgenic *Arabidopsis* seedlings carrying *AtHAK5pro:LUCIFERASE* are shown. Three-day-old seedlings were incubated with ACC for 24 h under the  $\text{K}^+$ -sufficient (+K, 5 mM  $\text{K}^+$ ) conditions. Yellow and red colors indicate a high luciferase expression. Experiments were performed three times, and data from one experiment are shown here.

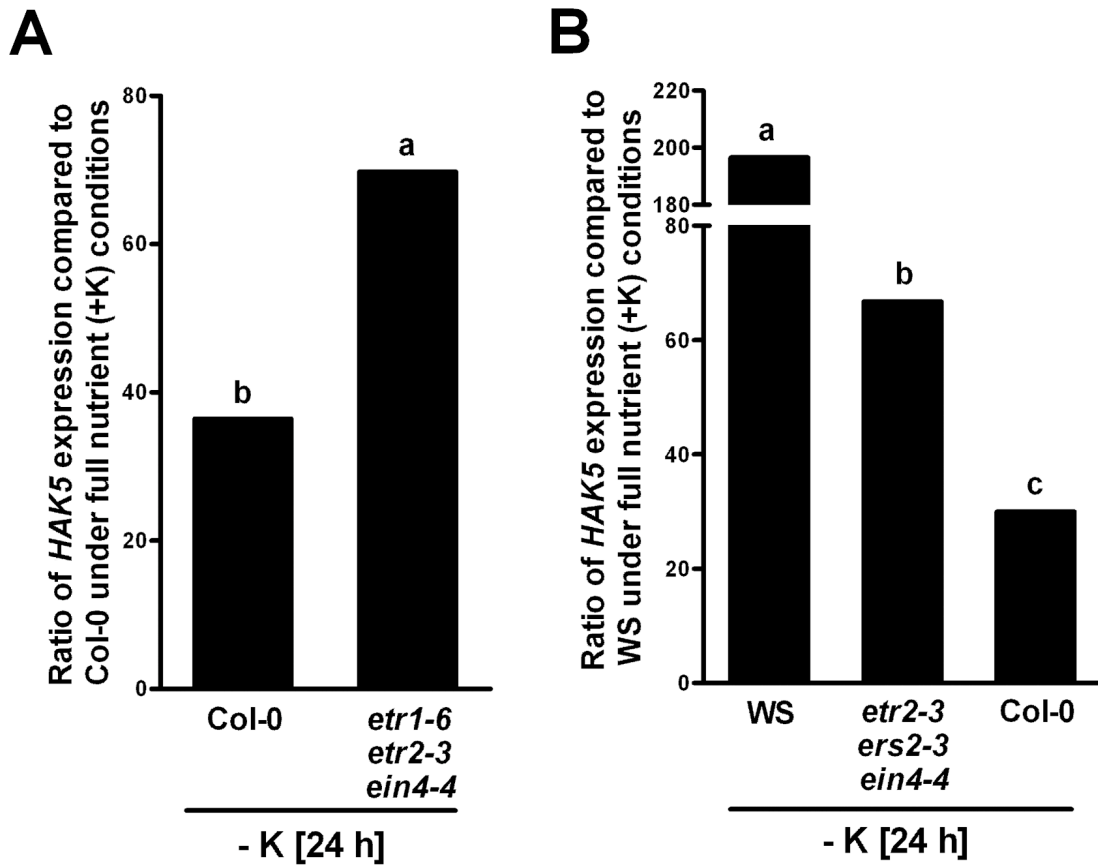

**Supplemental Figure 2.** Low  $K^+$  induces *HAK5* expression in triple mutants of ethylene receptors.

(A) *HAK5* expression levels in *etr1-6 etr2-3 ein4-4* under  $K^+$ -deficient (no  $K^+$ ) conditions compared to Col-0 under full nutrient (+K) conditions. (B) *HAK5* expression levels in *etr2-3 ers2-3 ein4-4* under  $K^+$ -deficient (no  $K^+$ ) conditions compared to WS under full nutrient (+K) conditions.

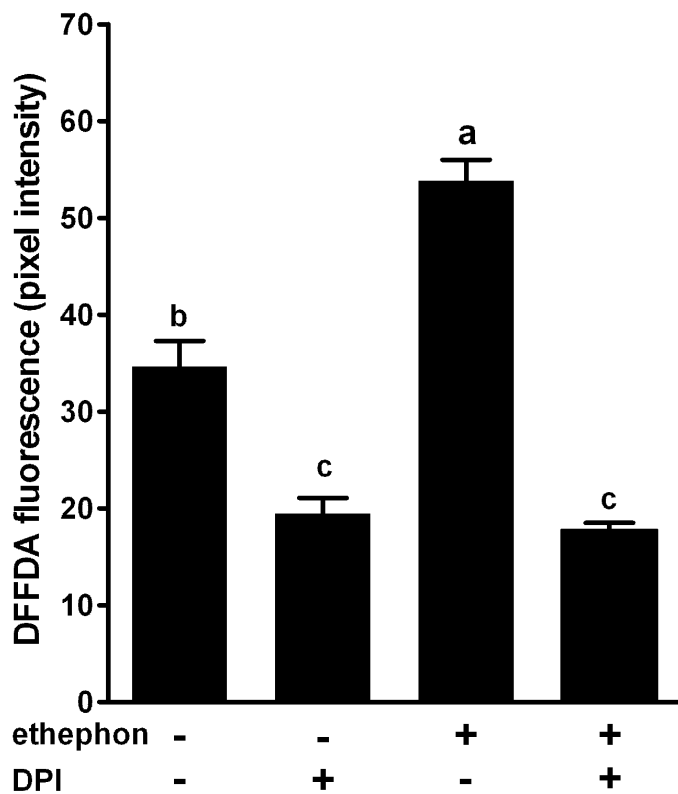

**Supplemental Figure 3.** DPI inhibits ethephon-induced ROS production in roots.

Three-day-old seedlings grown under full nutrient conditions were treated with 50  $\mu$ M ethephon for 2 h. Then seedlings were transferred to medium containing 50  $\mu$ M ethephon and 10  $\mu$ M DPI for 1 h. ROS images were collected following staining of roots with 20  $\mu$ M DFFDA. Quantified data were obtained using imageJ software (n=5 to 10 seedlings  $\pm$  SE). Means that have different letters at the top are significantly different (P < 0.05; t test).

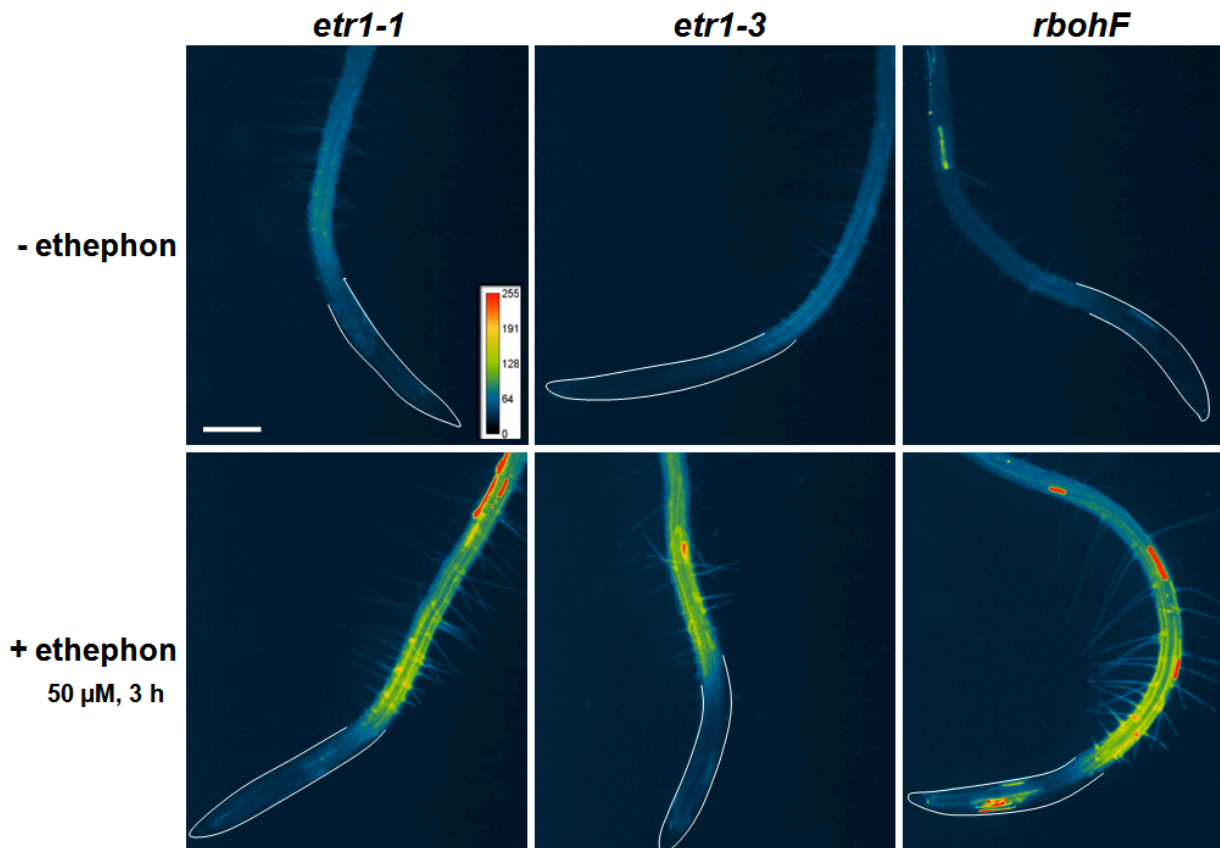

**Supplemental Figure 4.** Ethephon induces ROS production in *etr1-1*, *etr1-3* and *rbohF* plants.

Pseudocolor images of ROS fluorescence are shown for  $K^+$ -sufficient (1.75 mM  $K^+$ ) *etr1-1*, *etr1-3*, *rbohF* roots in the absence or presence of ethephon (scale is in pixel intensity). Three-day-old roots were treated with 50  $\mu$ M ethephon for 3 h, followed by staining with 20  $\mu$ M DFFDA. Yellow and red colors indicate a high ROS production. White lines were drawn by hand to show the boundary of roots. Scale = 200  $\mu$ m.

---

**Supplemental Table 1.** Root hair number under K<sup>+</sup>-deficient and -sufficient conditions

---

|           | Percent of total root hair cells <sup>a</sup> |             | Percent of root hair cells in the N position <sup>b</sup> |            |
|-----------|-----------------------------------------------|-------------|-----------------------------------------------------------|------------|
|           | 24 h                                          | 48 h        | 24 h                                                      | 48 h       |
| <b>+K</b> | 47.0 ± 1.17                                   | 49.5 ± 1.23 | 0 ± 0                                                     | 1.0 ± 0.70 |
| <b>-K</b> | 49.5 ± 1.23                                   | 49.5 ± 0.95 | 1.0 ± 0.70                                                | 1.0 ± 0.70 |

---

Values shown are means ± SE (n=200).

<sup>a</sup> Percentage of root hair-bearing epidermal cells among total epidermal cells counted, including cells in both the H and N positions.

<sup>b</sup> Percentage of root hair-bearing epidermal cells at the N position among total epidermal cells counted.

H position, epidermal cells that develop into hair cells.

N position, epidermal cells that develop into nonhair cells.

---

**Supplemental Table 1.** K<sup>+</sup> deprivation does not cause ectopic root hair formation in *Arabidopsis*. Plants were grown under full nutrient conditions (+K, 1.75 mM K<sup>+</sup>) for 2 d and then transferred to either full nutrients (+K) or no potassium (-K) for 24 and 48 h.
